# Supplementary material for: 8-OxoG-Dependent Regulation of Global Protein Responses Leads to Mutagenesis and Stress Survival in Bacillus subtilis
Source: MDPI journal article supplement (doi:10.3390/antiox13030332), 2024-03-08
Supplement: s1 [file s1]

| NAME  | WT         | WT H2O2    | GO         |
|-------|------------|------------|------------|
| oppA  | 66.2844876 | 31.5539129 | 116.193409 |
| rocG  | 11.1012873 | 1.1187159  | 4.83842806 |
| dhbF  | 8.51313401 | 5.70110876 | 19.0240959 |
| pta   | 63.5932037 | 76.9351772 | 49.4212872 |
| rplT  | 76.7220528 | 94.2505718 | 91.2257509 |
| rocA  | 44.3248163 | 7.93084664 | 18.5054246 |
| serA  | 9.94227206 | 8.30781045 | 10.3427878 |
| yxeB  | 38.2419084 | 43.867067  | 52.5925015 |
| ald   | 128.957536 | 109.243062 | 119.508883 |
| yqiG  | 3.003708   | 6.68311727 | 1.79025741 |
| yumC  | 22.9555737 | 27.2002958 | 33.1163224 |
| coaE  | 0.66947898 | 0.25978931 | 6.39219811 |
| katA  | 5.21294656 | 87.8612257 | 227.715764 |
| ffh   | 2.34984793 | 0.23210245 | 6.83356212 |
| gbsR  | 3.13059856 | 0.93450198 | 6.55785951 |
| pyrAB | 85.128279  | 135.42923  | 83.3004553 |
| rplW  | 37.1197864 | 45.7605477 | 43.8238054 |
| rocD  | 38.9702137 | 16.3093242 | 23.539327  |
| glmS  | 1.31572478 | 3.07872553 | 4.78467965 |
| rplQ  | 117.739859 | 147.923922 | 130.860474 |
| murF  | 5.19378616 | 6.46590828 | 5.72504927 |
| queA  | 32.822251  | 38.51642   | 35.0571777 |
| acoA  | 36.1474198 | 9.00278545 | 26.1140184 |
| aspB  | 25.2314043 | 28.1712139 | 17.1823148 |
| iolS  | 26.3595547 | 43.7646773 | 33.7526234 |
| putC  | 59.4500589 | 22.6703936 | 57.4458492 |
| cheW  | 12.3541715 | 12.9303492 | 15.835926  |
| feuA  | 2.83825476 | 1.09460943 | 0          |
| dhbB  | 199.4802   | 221.869362 | 204.918263 |
| recA  | 2.72141585 | 10.8921683 | 5.85721336 |
| fabL  | 5.4968116  | 3.88993573 | 0.84017868 |
| prs   | 28.1026314 | 34.4140377 | 28.7573479 |
| yvfG  | 4.59346464 | 5.71675851 | 2.98862169 |
| pksL  | 11.9183091 | 14.187507  | 9.62621179 |
| kbl   | 23.2147537 | 16.8034051 | 38.2634972 |
| tpx   | 111.631733 | 153.502599 | 133.010419 |
| acoB  | 83.401836  | 30.22378   | 74.3446406 |
| odhB  | 90.0460212 | 101.118463 | 126.109261 |
| rocF  | 50.6220331 | 14.3889944 | 22.830865  |
| hisA  | 17.3922563 | 22.1044703 | 19.1120285 |
| pfkA  | 47.821115  | 60.7368562 | 51.3582347 |
| pyrF  | 157.823385 | 202.203105 | 49.3766625 |

|      |            |            |            |
|------|------------|------------|------------|
| salA | 20.0282226 | 29.1176584 | 27.3457017 |
| yjoA | 10.9287602 | 17.6650553 | 10.1158038 |
| yvzB | 36.3317319 | 40.639148  | 9.61404436 |
| acoC | 21.7238276 | 16.9819966 | 22.9397357 |
| hag  | 639.352407 | 736.043146 | 255.91983  |
| dat  | 116.197536 | 143.909046 | 49.4802482 |
| dltA | 8.40294435 | 13.0409665 | 10.2804973 |
| ydcI | 5.51316763 | 7.05964925 | 4.84260734 |
| rpoB | 59.5407052 | 58.5721921 | 68.7181293 |
| yjbG | 21.6043082 | 25.8633641 | 26.1448814 |
| hemL | 11.7496127 | 13.472263  | 23.2932889 |
| cspD | 31.334523  | 25.9331763 | 51.2649367 |
| wprA | 9.3117596  | 13.717352  | 14.2723825 |
| sdhB | 4.60081065 | 5.81671899 | 8.50682429 |
| lepA | 6.66036842 | 7.50931647 | 7.23537608 |
| yjcG | 18.8069018 | 15.2423893 | 18.5013206 |
| rplE | 103.937205 | 121.490018 | 100.517917 |
| yopA | 60.5259549 | 75.8480733 | 23.3389942 |
| nadC | 20.6023314 | 18.8368857 | 16.7451657 |
| odhA | 105.199661 | 110.633096 | 138.350998 |
| liaH | 13.6162681 | 11.2718827 | 9.52015644 |
| sucC | 148.007343 | 122.510741 | 171.131291 |
| clpE | 2.63637014 | 3.30491538 | 3.58480287 |
| ycsA | 3.4760094  | 4.76717376 | 6.46053253 |
| yvgN | 34.7002227 | 48.6863808 | 54.6155222 |
| clpP | 23.8852904 | 31.9069623 | 26.1414796 |
| ahpF | 19.5535017 | 39.2488391 | 169.196237 |
| rpsC | 162.567    | 180.302667 | 182.076138 |
| xkdC | 2.80771307 | 3.70613678 | 4.6338842  |
| pyrG | 24.6964436 | 28.0135601 | 25.2081233 |
| mntB | 1.05809038 | 0.48929988 | 0.74067481 |
| pyrB | 9.24719994 | 15.451222  | 8.57392662 |
| acoL | 23.7162715 | 14.4917152 | 21.9185932 |
| yvcT | 28.6694223 | 32.7465513 | 31.8930503 |
| gabD | 9.31497541 | 12.9374739 | 11.9796881 |
| iolA | 31.1450716 | 55.0554494 | 61.3264684 |
| iolW | 21.6626983 | 24.826288  | 19.0570635 |
| ydjF | 28.2896415 | 31.620537  | 28.7022458 |
| atpG | 21.3602707 | 9.32688679 | 23.5289777 |
| rplD | 84.6304158 | 111.935745 | 76.9078033 |
| gcvT | 7.3129947  | 5.80437543 | 12.4871562 |
| sucD | 55.7774093 | 47.2642752 | 58.7489302 |
| yqeY | 13.5365818 | 8.8694452  | 11.4046761 |

|        |            |            |            |
|--------|------------|------------|------------|
| divIVA | 41.1168896 | 49.1410904 | 36.5935838 |
| vyvD   | 8.17653139 | 9.96299899 | 6.19052328 |
| ylmB   | 6.26833826 | 7.16020447 | 5.4755891  |
| pdhD   | 174.469881 | 188.993321 | 185.805279 |
| iolU   | 1.28516281 | 0.80416978 | 2.14860672 |
| prfA   | 5.88828795 | 7.95946964 | 2.51143551 |
| malS   | 3.17055616 | 1.79558999 | 3.1536737  |
| namA   | 2.25110988 | 7.04454581 | 5.38963002 |
| drm    | 11.6330529 | 4.82809306 | 9.39095471 |
| metK   | 33.2628578 | 37.4558675 | 34.96301   |
| purA   | 6.9706755  | 8.50821502 | 4.71286649 |
| yqiT   | 26.1930817 | 24.30226   | 24.078636  |
| yfkl   | 15.0417219 | 18.8713792 | 14.3917403 |
| yknY   | 4.59816317 | 10.8444748 | 8.93364669 |
| sufC   | 36.6467991 | 53.1183962 | 77.1509435 |
| bfmBAB | 19.2294022 | 15.3254085 | 15.3302644 |
| yhaM   | 36.7715968 | 31.9673339 | 34.4779383 |
| clpC   | 36.7309412 | 43.8046739 | 41.1094169 |
| serB   | 7.50919622 | 9.30350769 | 8.1275231  |
| gerPE  | 5.22182885 | 2.85181927 | 1.69005447 |
| artP   | 15.7284213 | 17.2375778 | 15.0037951 |
| rplU   | 115.81824  | 129.076161 | 135.436004 |
| alaS   | 104.385551 | 154.810919 | 9.72981084 |
| hisS   | 7.2763656  | 5.70662398 | 5.95932734 |
| adk    | 20.7390675 | 24.9030442 | 19.648668  |
| gatA   | 33.4013862 | 37.5321876 | 40.5113483 |
| rplF   | 51.9590887 | 63.8876303 | 56.2354568 |
| sdhA   | 4.73954524 | 6.79431657 | 5.69426846 |
| pyrC   | 5.47631347 | 8.93102095 | 4.22165529 |
| ahpC   | 250.286535 | 478.278169 | 0.01977544 |
| bfmBC  | 24.9023375 | 32.4905438 | 24.7989686 |
| icd    | 22.1843181 | 13.7671279 | 20.3529587 |
| copZ   | 0.99927829 | 2.16849801 | 1.98527747 |
| pksJ   | 37.9112088 | 40.8135601 | 44.1113099 |
| iolH   | 1.49440427 | 3.04649705 | 3.32016856 |
| smc    | 3.04909329 | 4.94652394 | 9.36561865 |
| bfmBB  | 37.7414373 | 33.2943151 | 32.5164216 |
| pyrH   | 14.8366852 | 16.6640094 | 17.3051839 |
| rplM   | 18.6952538 | 22.5918838 | 19.7079347 |
| ylbN   | 4.06152034 | 8.67918359 | 1.94666406 |
| fumC   | 36.9047472 | 55.3972501 | 68.0144296 |
| groEL  | 89.7967363 | 127.875147 | 89.2956937 |
| dck    | 7.09070139 | 9.79847036 | 7.12488996 |

|       |            |            |            |
|-------|------------|------------|------------|
| degU  | 1.70794206 | 2.45201035 | 3.631446   |
| yxIF  | 4.77656627 | 7.25474883 | 23.5554157 |
| dhaS  | 49.7631386 | 39.7433424 | 75.4537116 |
| spoVS | 21.1125657 | 24.8379005 | 24.7477769 |
| pgk   | 116.200237 | 146.700257 | 119.788063 |
| ftsH  | 9.72386677 | 7.8785644  | 16.6839443 |
| nadK2 | 9.37290893 | 7.65899424 | 11.9504816 |
| cmk   | 3.75810915 | 3.21970102 | 3.00036973 |
| pyk   | 62.6480705 | 75.5922041 | 59.5882922 |
| gcvPB | 12.9079015 | 10.7680929 | 16.4107966 |
| rpsB  | 62.5830004 | 83.8808809 | 66.5318182 |
| mbI   | 29.3371734 | 38.8518213 | 36.7896037 |
| fmt   | 4.54714459 | 4.95109937 | 2.87321139 |
| pdhB  | 238.640964 | 298.508662 | 222.596371 |
| sufD  | 25.5752753 | 30.9469546 | 61.2326156 |
| ypfD  | 77.4546062 | 65.7017344 | 99.6262715 |
| hupA  | 303.465688 | 359.108447 | 401.52926  |
| aroA  | 32.2950111 | 40.3936761 | 27.4497369 |
| fusA  | 115.909225 | 148.154765 | 148.828079 |
| gyrB  | 53.4477838 | 66.2065383 | 43.014744  |
| iolC  | 18.8353188 | 28.5724921 | 38.3745271 |
| ychF  | 24.6693618 | 28.5325645 | 27.6922766 |
| apt   | 18.1203686 | 23.4746067 | 17.7468005 |
| tpiA  | 31.9141964 | 39.3529894 | 30.4095001 |
| citZ  | 40.6567098 | 34.3813938 | 48.0831211 |
| secA  | 4.01691082 | 4.6191225  | 8.12002531 |
| grpE  | 51.4840562 | 56.6998427 | 60.2760529 |
| yqjE  | 4.54720099 | 4.80852348 | 4.68117591 |
| obg   | 7.56293661 | 10.2601338 | 6.08059543 |
| pnp   | 28.0793037 | 33.2096383 | 27.9195034 |
| serS  | 24.2186566 | 15.4503337 | 21.3463962 |
| yhfK  | 8.1009218  | 11.9626337 | 9.77537171 |
| thiN  | 1.4248556  | 0          | 1.54508835 |
| ppsA  | 2.50123454 | 3.96516475 | 5.33585923 |
| rpmC  | 41.7324995 | 50.3613918 | 36.283849  |
| yugJ  | 10.769641  | 18.4071699 | 21.3943118 |
| cshA  | 51.7164367 | 61.3052083 | 66.9584723 |
| yitK  | 9.3542891  | 12.6531919 | 10.4586856 |
| fliY  | 16.243924  | 16.8976148 | 34.7023991 |
| rpsS  | 37.0815524 | 47.1202609 | 36.2737382 |
| gerKC | 3.12461662 | 6.10320734 | 2.62600447 |
| der   | 2.69816893 | 2.09948204 | 2.58648814 |
| ddl   | 19.0357651 | 18.7045567 | 18.0893086 |

|       |            |            |            |
|-------|------------|------------|------------|
| yeel  | 14.3379702 | 15.9605893 | 16.7135564 |
| gndA  | 16.4194929 | 17.0204603 | 13.3564123 |
| dhbE  | 42.8135079 | 48.4457597 | 76.334652  |
| ykwC  | 6.86304682 | 6.22644686 | 1.00083126 |
| yjjA  | 9.28053633 | 6.1336621  | 11.0286055 |
| argD  | 7.52162157 | 14.4447502 | 21.0183308 |
| sigX  | 23.9160113 | 27.9862133 | 25.5579838 |
| yhfQ  | 6.35342268 | 4.96400938 | 5.5135135  |
| guaB  | 69.1241553 | 77.3582333 | 44.8944348 |
| nadE  | 36.1174884 | 44.7829672 | 29.6074529 |
| accD  | 8.16582159 | 6.30041465 | 8.94806897 |
| yheA  | 20.0555806 | 24.7157728 | 19.7128225 |
| hom   | 16.3235202 | 18.8129735 | 13.5544355 |
| bipA  | 22.4900817 | 25.7474174 | 21.061017  |
| purL  | 33.5131515 | 35.4117645 | 36.1743458 |
| cymR  | 1.32081054 | 3.69686374 | 27.8149044 |
| nusG  | 6.2554518  | 8.96068994 | 6.78527854 |
| yfmC  | 13.0778169 | 14.0698785 | 12.7591532 |
| yjbL  | 22.8329489 | 16.0546356 | 23.7643034 |
| metG  | 20.6382236 | 26.5223676 | 22.3284928 |
| rplO  | 6.17956807 | 5.49481915 | 7.69907209 |
| clpX  | 23.9038463 | 20.7347839 | 29.7271402 |
| eno   | 247.302908 | 277.56723  | 271.62964  |
| rbsR  | 29.671579  | 33.9456771 | 30.114307  |
| ytsJ  | 13.7225536 | 17.5117598 | 1.39866082 |
| iolG  | 18.7066074 | 21.3695113 | 27.7804725 |
| cysS  | 7.33283743 | 8.46149008 | 8.25702953 |
| yhcG  | 3.26508363 | 4.2997161  | 3.06582614 |
| floA  | 6.37617508 | 8.20009925 | 9.16985693 |
| ppaC  | 50.5777082 | 64.112072  | 44.4155972 |
| yceE  | 19.295924  | 25.3852233 | 28.2257001 |
| dnaN  | 12.5850391 | 14.6167083 | 14.9705339 |
| asnS  | 12.2065592 | 14.2563766 | 9.22289008 |
| rpsH  | 38.9856736 | 49.5452581 | 33.5914066 |
| sufS  | 10.793507  | 17.656646  | 16.040935  |
| tuf   | 476.540965 | 516.140298 | 541.92997  |
| flgG  | 16.5416005 | 24.4641317 | 16.698344  |
| fabI  | 33.6574566 | 36.5461936 | 36.2062904 |
| yoxD  | 11.6684043 | 15.26686   | 9.15932597 |
| pyrAA | 8.80281647 | 11.6763782 | 7.35102164 |
| gudB  | 24.4406553 | 19.6736867 | 38.5445451 |
| fliG  | 4.94588656 | 3.79257144 | 9.36887703 |
| ioLE  | 14.0512832 | 24.1699356 | 29.2113474 |

|       |            |            |            |
|-------|------------|------------|------------|
| putB  | 11.5044917 | 8.63947981 | 9.10279181 |
| licH  | 96.7573985 | 88.6966978 | 45.4700509 |
| pgcA  | 23.0348767 | 26.7442178 | 26.1959267 |
| tig   | 229.482025 | 268.961905 | 264.33005  |
| ytsP  | 5.76412153 | 8.29208194 | 4.91457143 |
| fabD  | 13.0718979 | 14.842386  | 8.62675376 |
| pgl   | 3.95135508 | 3.29065086 | 13.6632382 |
| ftsA  | 11.7703811 | 10.7822707 | 10.9395233 |
| ndk   | 15.8681711 | 15.2376136 | 14.9207751 |
| gyrA  | 7.89036857 | 6.36197415 | 10.3223019 |
| pheS  | 8.0842159  | 9.79009009 | 14.6674763 |
| frr   | 64.3013308 | 74.2907554 | 55.7442667 |
| guaA  | 110.973872 | 125.575123 | 84.2148165 |
| rpsG  | 208.753305 | 251.56346  | 212.528245 |
| dnaK  | 54.2050748 | 59.1697128 | 75.5750584 |
| dapA  | 7.95401351 | 8.79196775 | 6.00177278 |
| lrgB  | 1.7360137  | 3.5252901  | 2.10367906 |
| ytpR  | 8.30918687 | 14.5311787 | 4.83881896 |
| thrS  | 9.37370702 | 11.1619932 | 7.86337866 |
| cheV  | 10.0242358 | 12.1503095 | 7.78950983 |
| yfkO  | 3.07256852 | 4.51363814 | 1.70794799 |
| ileS  | 6.6880079  | 7.08598213 | 9.58670523 |
| ampS  | 20.1051501 | 22.3212982 | 28.6960599 |
| rplB  | 141.78549  | 165.494639 | 141.191655 |
| glcD  | 7.73594087 | 8.85359932 | 5.3807821  |
| malR  | 2.64374983 | 2.37548748 | 2.34092074 |
| yfiY  | 18.7209888 | 19.7394143 | 29.318287  |
| yciB  | 0.54369991 | 3.02916993 | 15.593276  |
| ioll  | 22.1162611 | 34.9706158 | 51.5170041 |
| murAB | 6.22230137 | 7.92397727 | 1.03449964 |
| yugl  | 16.8401534 | 22.5252799 | 12.5740681 |
| fhuD  | 23.7604379 | 30.5942603 | 28.3447614 |
| glxK  | 11.6685381 | 14.6135512 | 7.0935526  |
| punA  | 20.6766463 | 27.2429823 | 18.3495985 |
| tcyK  | 21.6821323 | 26.0436206 | 21.9264359 |
| aroC  | 6.39575816 | 7.37052784 | 4.22496571 |
| dapH  | 6.90919743 | 8.18871    | 5.3634365  |
| rbsA  | 23.2037635 | 25.2256317 | 31.4112633 |
| yerC  | 1.54561434 | 1.07713924 | 1.42926519 |
| aroA  | 1.2844365  | 1.6528698  | 5.45944699 |
| ylqG  | 12.8453992 | 17.9558311 | 14.9454523 |
| lplJ  | 6.11602888 | 10.1263412 | 5.92304148 |
| menB  | 45.3761032 | 41.8240697 | 51.9256972 |

|       |            |            |            |
|-------|------------|------------|------------|
| rpIN  | 133.413171 | 140.138152 | 130.410223 |
| gpml  | 5.96586246 | 7.71328326 | 4.4884521  |
| pdxS  | 27.218608  | 38.9097769 | 9.74934038 |
| iolJ  | 11.3504012 | 15.9855997 | 14.8430902 |
| aspS  | 19.2607678 | 22.8159699 | 20.2443728 |
| ackA  | 92.6907331 | 106.782808 | 82.3988165 |
| srfAB | 96.9524155 | 107.759018 | 106.019572 |
| yqbO  | 4.51307636 | 5.60930715 | 7.59132994 |
| yfmS  | 47.572336  | 56.900522  | 32.3572451 |
| tyrS1 | 12.8424343 | 13.9396195 | 11.1241125 |
| ysdC  | 4.79824055 | 5.62326936 | 4.4128916  |
| rpLL  | 85.962777  | 88.9343328 | 93.5427604 |
| mtrB  | 1.95749475 | 2.65134528 | 2.55932576 |
| ycsD  | 1.35039964 | 0.65888549 | 2.12707352 |
| nfrA1 | 3.62366392 | 5.26345468 | 2.2494566  |
| ymfH  | 6.3506467  | 5.77026824 | 8.8440831  |
| sufB  | 26.7066981 | 31.4529429 | 62.1451815 |
| mntR  | 2.90775758 | 4.19406772 | 2.261144   |
| groES | 12.1856687 | 18.4523227 | 12.010428  |
| ptsI  | 47.3694585 | 57.0277221 | 37.0837051 |
| gmK   | 9.32513356 | 10.8932842 | 5.1332285  |
| yrkQ  | 8.0727928  | 6.75815136 | 4.5888319  |
| yjID  | 24.4818772 | 27.5605502 | 29.9848146 |
| ansA  | 9.63640216 | 13.467229  | 6.45055206 |
| dapG  | 2.27113037 | 2.04928241 | 4.97707754 |
| hemB  | 0.97143446 | 0.78629748 | 3.18768311 |
| iscS2 | 9.28397927 | 16.8104452 | 0.47796997 |
| murE  | 2.2485864  | 3.34703963 | 5.28112264 |
| tgt   | 1.72794998 | 1.99617467 | 2.33992284 |
| hprT  | 6.76002607 | 6.12035382 | 8.96467096 |
| citB  | 49.2642107 | 58.521376  | 50.496734  |
| ptsG  | 3.26889936 | 4.60180348 | 3.96037305 |
| pbpC  | 8.89301953 | 10.1381421 | 6.14340432 |
| ADH1  | 88.1653098 | 102.276826 | 90.7554625 |
| argS  | 1.73333838 | 1.31116302 | 1.81526097 |
| glnA  | 41.7904669 | 47.1526726 | 34.2452585 |
| ydhD  | 70.8175253 | 86.1474247 | 69.9603246 |
| metC  | 32.2785244 | 39.0443796 | 25.0015569 |
| serC  | 19.2553497 | 18.4245731 | 21.6541613 |
| ypgR  | 2.4278712  | 4.12426801 | 1.98023682 |
| yopQ  | 3.96348513 | 5.56038288 | 3.6799178  |
| wapA  | 22.1313821 | 22.5135979 | 28.0785967 |
| mdh   | 205.352464 | 230.328542 | 241.633642 |

|       |            |            |            |
|-------|------------|------------|------------|
| zwf   | 25.3847259 | 29.3058371 | 27.9486975 |
| rpsK  | 47.0895059 | 49.443513  | 53.6283333 |
| yflT  | 13.3239711 | 12.4776144 | 1.89285363 |
| rplV  | 58.0997349 | 61.2711712 | 50.7956865 |
| hemAT | 16.4523165 | 22.1988177 | 11.6551105 |
| rnjB  | 5.07752206 | 5.87978244 | 6.09878821 |
| panB  | 2.03086719 | 2.80979667 | 1.159723   |
| rbsB  | 28.8558494 | 25.3940764 | 38.6631176 |
| ligd  | 3.16494447 | 2.11209373 | 2.4928247  |
| ilvC  | 7.7754642  | 11.5614103 | 5.11604672 |
| kinE  | 1.95167873 | 2.45177369 | 5.14956505 |
| ykuJ  | 15.1347014 | 15.8352504 | 15.4419652 |
| murD  | 6.72998917 | 6.4555236  | 7.74421394 |
| srfAA | 24.7356283 | 26.0381422 | 37.0143857 |
| fabF  | 0.84937233 | 0.68039479 | 2.09741375 |
| codY  | 34.8031162 | 35.8022483 | 34.7973555 |
| pncB  | 8.29372508 | 9.54685785 | 8.41924777 |
| gatB  | 6.9892537  | 7.89707315 | 7.96701421 |
| leuA  | 19.9999107 | 18.1067992 | 17.4148986 |
| yclQ  | 4.04169756 | 3.65139576 | 2.44607612 |
| murC  | 13.9414252 | 11.2911686 | 13.3767132 |
| tkk   | 234.880652 | 239.52092  | 220.714321 |
| yvlB  | 7.0914687  | 7.89048339 | 7.10995955 |
| fabG  | 25.482327  | 28.9248174 | 37.4880279 |
| ftsZ  | 18.3567787 | 15.5956855 | 15.0188672 |
| yukE  | 13.2698037 | 14.2548358 | 93.9291172 |
| tsf   | 170.035899 | 192.656826 | 155.269944 |
| rpsJ  | 158.895931 | 180.151009 | 136.661043 |
| pdhC  | 30.4666035 | 35.7602255 | 21.7134415 |
| iolD  | 21.2231151 | 23.9123228 | 18.2567695 |
| gapA  | 269.738011 | 287.882599 | 234.188617 |
| rlbA  | 3.92523449 | 4.16341492 | 4.64839119 |
| yodC  | 3.32219277 | 4.17133709 | 1.51469805 |
| pckA  | 66.1763104 | 63.9695647 | 78.9864778 |
| trxA  | 1.17689665 | 1.97914784 | 2.34699762 |
| cspB  | 82.071528  | 88.3826934 | 87.8119115 |
| pgi   | 191.757303 | 201.950239 | 203.81505  |
| rnjA  | 5.16093864 | 5.78998782 | 4.4380025  |
| ydiJ  | 4.0144446  | 3.69280524 | 5.8164768  |
| rplS  | 43.4649047 | 45.7542696 | 50.7132246 |
| ykvZ  | 0.85835407 | 2.47304525 | 0.1618982  |
| accC1 | 11.5905668 | 12.7459975 | 15.8902063 |
| yheD  | 4.36324864 | 5.85645542 | 2.22461324 |



|       |            |            |            |
|-------|------------|------------|------------|
| infB  | 131.498045 | 115.762942 | 146.097377 |
| pepT  | 12.3795736 | 13.0959206 | 13.5428883 |
| lipA  | 4.41275451 | 7.43057038 | 1.39512619 |
| engB  | 22.1390993 | 15.7485343 | 13.6550804 |
| ycgT  | 4.09011569 | 5.6929435  | 1.85959984 |
| ponA  | 11.4857106 | 13.4014676 | 12.1886006 |
| rpoA  | 27.4668564 | 27.8782564 | 27.5975952 |
| pyrE  | 10.0702096 | 11.8415992 | 9.93925939 |
| tcyA  | 9.90433789 | 10.5889168 | 8.09334621 |
| glyA  | 10.5653142 | 9.65316396 | 15.3431612 |
| pepA  | 1.83291489 | 1.68559197 | 3.57323912 |
| fliD  | 6.48345531 | 5.17954629 | 7.51613465 |
| gpsA  | 3.95583453 | 4.30426681 | 3.30987304 |
| atpC  | 3.08249593 | 3.49189833 | 5.16757321 |
| atpD  | 78.1238587 | 84.6479721 | 105.393014 |
| spo0M | 24.0381771 | 25.3085757 | 8.69520285 |
| yfjO  | 33.1730793 | 34.2475692 | 30.5417277 |
| yxjE  | 1.34377043 | 1.4370305  | 2.54102491 |
| gntZ  | 2.86566605 | 2.61944359 | 2.78496418 |
| fabHA | 0.6124704  | 1.12612633 | 0.61043178 |
| rbsK  | 47.6560682 | 46.0181367 | 49.5804889 |
| glpK  | 10.6356993 | 11.2764755 | 9.47922343 |
| ganS  | 3.76525904 | 5.52156749 | 5.04545308 |
| mleA  | 8.37326786 | 8.22878845 | 5.0297926  |
| glcR  | 0.92121806 | 1.16454223 | 0.31791738 |
| yceH  | 2.1364166  | 2.22657809 | 2.15958    |
| infC  | 13.1940871 | 13.758138  | 18.4142242 |
| minD  | 0.33575426 | 0.49838097 | 0.479587   |
| rapB  | 4.85471534 | 4.81176072 | 2.23219238 |
| prsA  | 49.3526503 | 52.7821744 | 75.5358262 |
| yvnB  | 0.17603778 | 0.25549379 | 0.19813055 |
| ykuP  | 43.1917928 | 39.9348585 | 48.4272691 |
| buk   | 10.1189327 | 8.95175506 | 7.10216516 |
| spoVG | 10.8464617 | 9.43103551 | 16.15855   |
| ykvY  | 3.44079879 | 3.64757689 | 5.03882972 |
| clpY  | 6.51907264 | 6.61420542 | 7.04245173 |
| mleA  | 7.74017345 | 8.11234473 | 8.30667217 |
| sdaAA | 4.9012442  | 4.77898684 | 0.88354377 |
| deoD  | 9.86138664 | 10.1320069 | 7.46955427 |
| yokG  | 14.8193044 | 12.1963115 | 10.9813967 |
| abrB  | 19.2007434 | 16.2301624 | 12.5003048 |
| rapC  | 1.04540089 | 0.99935901 | 0          |
| pyc   | 28.1034495 | 26.831132  | 22.0049308 |

|       |            |            |            |
|-------|------------|------------|------------|
| cadA  | 4.76198159 | 3.30746373 | 12.9058858 |
| pdhA  | 34.715087  | 35.5784625 | 35.6968148 |
| glpD  | 24.0117403 | 24.997462  | 21.6645104 |
| tenI  | 11.904709  | 12.1729209 | 14.1252385 |
| dhbA  | 30.8611477 | 29.9569553 | 51.677667  |
| rplA  | 61.5139744 | 63.6793749 | 66.9509753 |
| nusA  | 21.2455785 | 22.0523388 | 19.9795863 |
| yvfR  | 26.8965843 | 32.3129745 | 20.013482  |
| yfhC  | 83.3275445 | 81.2877002 | 69.9122245 |
| yutI  | 15.8753985 | 16.6314392 | 14.3900076 |
| mreB  | 11.5460156 | 11.8453621 | 11.399873  |
| glxX  | 29.5833158 | 29.2537126 | 31.6549516 |
| ytkP  | 1.69703003 | 1.75323053 | 1.69598272 |
| dhbC  | 33.2462129 | 32.4266819 | 45.7243352 |
| atpA  | 136.875616 | 141.466696 | 199.388772 |
| yceD  | 21.1271699 | 18.9355044 | 34.9213205 |
| leuS  | 18.8095088 | 18.5262949 | 19.5265597 |
| fbaA  | 182.547168 | 184.834614 | 208.240273 |
| guaC  | 8.00739663 | 5.58987366 | 5.50249231 |
| ppiB  | 14.8601707 | 14.3149707 | 17.9384918 |
| yfmT  | 36.519178  | 37.0122003 | 18.4964166 |
| trmFO | 2.79303507 | 2.61792189 | 1.36239289 |
| srfAC | 17.2014633 | 18.6478309 | 9.28793324 |
| greA  | 10.7146215 | 10.3484251 | 12.0401418 |
| rpsF  | 66.0038688 | 64.9882029 | 65.8696623 |
| rpsE  | 61.3368866 | 63.5014795 | 68.2128786 |
| sat   | 21.4171481 | 21.596267  | 21.9767701 |
| ylbA  | 1.78943369 | 2.04624054 | 1.53939892 |
| proS  | 12.4451168 | 12.3896348 | 7.07293141 |
| asnB  | 10.6596885 | 15.6459192 | 5.59383164 |
| rsmA  | 4.38980639 | 4.40706851 | 5.45589441 |
| rpmA  | 24.3069578 | 25.6813454 | 18.4580983 |
| ohrA  | 0.42619696 | 0.45043588 | 0.23243869 |
| fadE  | 4.02067443 | 3.90023418 | 5.73169097 |
| gtA   | 33.5536911 | 33.895008  | 31.1048686 |
| rpoC  | 120.43382  | 121.425181 | 104.850393 |
| rbsD  | 7.68111428 | 7.71962664 | 6.90563293 |
| yobI  | 21.0629461 | 20.1550172 | 22.7716281 |
| cysK  | 94.0164038 | 97.8465595 | 91.8556527 |
| cheA  | 17.3158305 | 15.4049872 | 18.8012378 |
| dltD  | 4.73361411 | 4.54365755 | 6.27700149 |
| rplC  | 76.0467335 | 77.6408085 | 74.1502709 |
| tuaD  | 1.73438915 | 1.60780931 | 1.08913118 |

|      |            |            |            |
|------|------------|------------|------------|
| glmM | 8.26049432 | 8.19730851 | 10.0474264 |
| rplK | 208.550552 | 215.548632 | 173.701559 |
| yurT | 2.26169508 | 2.33309389 | 0.50336509 |
| efeM | 71.8972271 | 70.8142795 | 81.2210033 |
| pps  | 7.92167775 | 7.84873062 | 10.6573435 |
| pheT | 15.3462367 | 15.4985295 | 23.4306743 |
| dbpA | 14.6204741 | 14.9881883 | 14.039421  |
| gapB | 30.4551634 | 32.5565621 | 30.0016979 |
| bdhA | 70.3552131 | 71.0659763 | 78.1955171 |
| yueB | 7.28135286 | 7.07322401 | 8.91055924 |
| qoxA | 3.42636682 | 4.05320089 | 5.77167943 |
| ykoW | 1.20510996 | 1.7662412  | 0.87052275 |
| yerO | 2.90562559 | 3.12648172 | 1.28423759 |
| rpsD | 18.5302935 | 19.1701413 | 13.6528812 |
| speB | 0.77498666 | 0.74199929 | 0.37925586 |
| valS | 50.2370204 | 49.9605355 | 68.2295497 |
| tal  | 10.7679892 | 12.6517315 | 14.0090742 |
| fadN | 9.63897327 | 7.3542171  | 3.72166607 |
| lutC | 3.26608238 | 3.27026197 | 3.16805639 |
| sigF | 0          | 0          | 2.20840004 |

GOH2O2

57.9155637

0.19322503

10.6124288

53.643534

82.010021

2.02836387

8.09607804

35.9356163

89.3285784

4.75200675

27.3791259

6.02685708

161.066423

2.29139197

1.88921546

108.731605

43.7269299

10.1601807

6.84321342

121.18248

6.33866974

32.0884621

2.3704689

14.45035

39.2359819

7.69211161

15.5311635

0.11548668

143.040322

10.0710353

0.51807481

28.6733691

3.69424804

9.06657649

24.1346248

132.296029

13.5282573

103.616125

3.7403667

21.0219034

50.2588913

61.9249826

30.3364823  
7.1130761  
12.186043  
17.2053351  
314.153898  
53.4668633  
17.8342588  
5.60902415  
69.2067039  
23.6221195  
23.7668531  
33.4845545  
13.2215681  
8.14087359  
8.22200494  
14.7888053  
100.37005  
24.5922884  
18.2410939  
116.204481  
6.50609649  
127.771204  
3.2659202  
5.2905227  
50.210954  
25.1209846  
137.360393  
177.36678  
3.62719091  
24.9189744  
0.70498554  
15.0301507  
10.6070005  
34.6413051  
11.3392598  
51.2386298  
19.5750275  
25.6820665  
16.7526251  
80.7886538  
6.82556681  
45.6507268  
12.7878116

40.3703747  
7.56940561  
5.65701755  
179.465052  
0.79087442  
3.58433882  
3.07899539  
5.6427241  
10.737212  
36.180418  
6.1472898  
17.7659514  
14.6045783  
8.66371093  
73.8042777  
12.6914115  
29.0043336  
41.1178582  
9.43311693  
5.2503954  
12.9033424  
123.446576  
10.6050774  
5.96571172  
20.2723157  
37.7970967  
59.038317  
6.48180465  
6.59142298  
0.05736371  
28.4303036  
16.4124352  
18.2989826  
39.4900074  
7.16487036  
8.76530073  
26.7663519  
15.6303994  
20.1235292  
3.7761856  
58.031982  
95.1289408  
5.62657414

4.40221888  
20.4134211  
58.3012688  
27.1785953  
120.541198  
13.5683794  
9.83832343  
3.12159258  
63.2372294  
13.0768191  
70.5892404  
29.7526254  
3.62838664  
236.295301  
58.8646455  
75.8124697  
306.247023  
29.6346606  
143.83051  
42.7355874  
32.9043982  
25.2557485  
20.6568321  
31.1371243  
39.3107528  
7.17803934  
63.3865014  
3.60801356  
7.29085363  
29.6020628  
22.434471  
12.0877677  
0.11285713  
5.61682114  
38.4915765  
22.1023111  
68.0482237  
9.68092244  
26.6066713  
35.385305  
3.40425079  
1.6972918  
18.1144115

14.564102  
13.9855196  
44.0354393  
1.95745098  
9.0947513  
17.3116851  
26.393097  
5.36985284  
40.0754953  
29.2091036  
8.20434284  
18.5252251  
12.2185657  
24.0551367  
32.2463959  
24.0035309  
7.53823087  
10.2270682  
22.7514594  
20.8129021  
7.44979225  
24.9165488  
255.666538  
36.05085  
2.40973351  
23.5861118  
7.87701397  
3.44120667  
9.5698678  
46.4712164  
24.9433459  
15.7883746  
9.72438278  
34.1493791  
17.2621125  
477.275987  
14.6920134  
36.7899351  
9.32420967  
8.20994155  
28.3746596  
6.94091582  
26.8216051



4.14923584  
42.9558516  
24.078419  
258.961082  
5.30504676  
9.36043706  
19.1639327  
11.553843  
11.2975751  
8.67245914  
14.2401641  
58.2810361  
83.6296778  
197.714108  
70.5096375  
7.22623074  
4.87687565  
6.34248441  
6.50452997  
9.64769347  
2.21247599  
7.80117203  
22.9843796  
136.645771  
7.4144886  
2.53645752  
16.2670372  
14.3745938  
41.2083073  
2.56211031  
14.2711837  
23.4857617  
8.92829899  
23.8563299  
23.7873803  
2.91538399  
5.65701688  
24.9793767  
1.49902726  
4.72715548  
15.656408  
5.53521376  
48.155449

140.488838  
6.56594866  
11.692985  
15.9573799  
19.9548685  
82.7237402  
104.411146  
7.9249766  
27.6759299  
10.4152912  
3.785168  
78.5795122  
3.24502108  
0.55522771  
3.58128447  
7.03757384  
56.1402726  
4.52323916  
12.2472588  
40.9847066  
5.46937939  
3.89660377  
28.5496131  
9.18272834  
5.07222846  
2.8839175  
0.89608862  
5.54110732  
2.42119399  
8.59583565  
56.708026  
4.1711945  
7.32558698  
68.8024015  
2.00299129  
28.3967553  
73.3707701  
25.2421076  
18.9870347  
3.50470236  
4.26722919  
26.1402366  
185.262831

28.8516582  
47.5721656  
3.82874569  
54.8897218  
11.7139814  
5.7146638  
1.89201992  
24.7523903  
1.90315529  
6.1451905  
3.6245018  
15.4960584  
7.04016421  
32.633538  
2.19318285  
32.1900657  
10.0978855  
8.31167396  
14.6030211  
1.73281459  
12.9407464  
193.29509  
6.81644204  
33.2198436  
14.1980733  
107.04198  
153.905004  
120.892919  
22.5560243  
23.2182283  
242.117374  
4.73517357  
2.68507672  
67.7849583  
1.96348098  
79.6480659  
178.457519  
4.51432047  
6.80926835  
48.8700273  
0.11908344  
13.6709016  
3.07335151

118.702574  
14.0968538  
1.6544863  
10.6295991  
3.15084462  
14.8268182  
27.9298544  
12.2398272  
8.68696637  
13.0145823  
3.23055777  
6.56551334  
4.28081149  
2.83335951  
102.619515  
8.84959569  
31.1072262  
3.39015772  
2.83881412  
0.94225448  
37.8425288  
9.51155504  
3.56443016  
5.71407257  
0.77822102  
2.17660865  
20.2504886  
3.74997933  
3.56419771  
51.1115842  
0.55687732  
29.4185621  
5.92717468  
12.7102832  
5.11833802  
7.06537334  
7.95292253  
1.06565889  
8.15254933  
8.97404613  
14.232061  
0.09510114  
21.0150704

7.02135825  
30.6137854  
23.9588944  
12.0542946  
33.8383219  
64.9772988  
19.8135312  
16.2902866  
59.405689  
13.932974  
14.4075299  
28.3548025  
1.98501058  
36.7724331  
167.630943  
32.1687009  
20.4056678  
187.852927  
0.98446676  
16.070234  
17.4620118  
1.10858283  
10.2804655  
9.6149041  
69.5134341  
60.8723501  
19.9595475  
1.57242841  
7.85941175  
7.82279282  
4.76445104  
20.3095833  
9.33628878  
4.98172669  
27.8458723  
107.843342  
5.9028194  
22.7506335  
87.9223275  
21.0309353  
6.17070233  
75.8220899  
2.4964372

9.39619667  
173.1333  
1.02386853  
75.8877789  
12.9472858  
20.0566018  
13.9672554  
31.6775337  
75.0107693  
8.10750144  
6.64463101  
2.10227536  
1.27816111  
13.3387313  
1.45301174  
64.5363204  
11.916416  
8.41200178  
4.66657241  
1.59193291
