# Supplementary material for: 8-OxoG-Dependent Regulation of Global Protein Responses Leads to Mutagenesis and Stress Survival in Bacillus subtilis
Source: MDPI journal article supplement (doi:10.3390/antiox13030332), 2024-03-08
Supplement: s1 [file s1]

## SUPPLEMENTARY MATERIAL (Figures)

# **8-OxoG-Dependent Regulation of Global Protein Responses Leads to Mutagenesis and Stress Survival in *Bacillus subtilis***

Lisett E. Martínez<sup>1</sup>, Gerardo Gómez<sup>1</sup>, Norma Ramírez<sup>1</sup>, Bernardo Franco<sup>1</sup>,  
Eduardo A. Robleto<sup>2</sup>, Mario Pedraza-Reyes<sup>1,\*</sup>

<sup>1</sup> Department of Biology, Division of Natural and Exact Sciences, University of Guanajuato, Guanajuato 36050, Mexico

<sup>2</sup> School of Life Sciences, University of Nevada, Las Vegas, NV 89557, USA

\* Address correspondence to M. Pedraza-Reyes; [pedrama@ugto.mx](mailto:pedrama@ugto.mx)

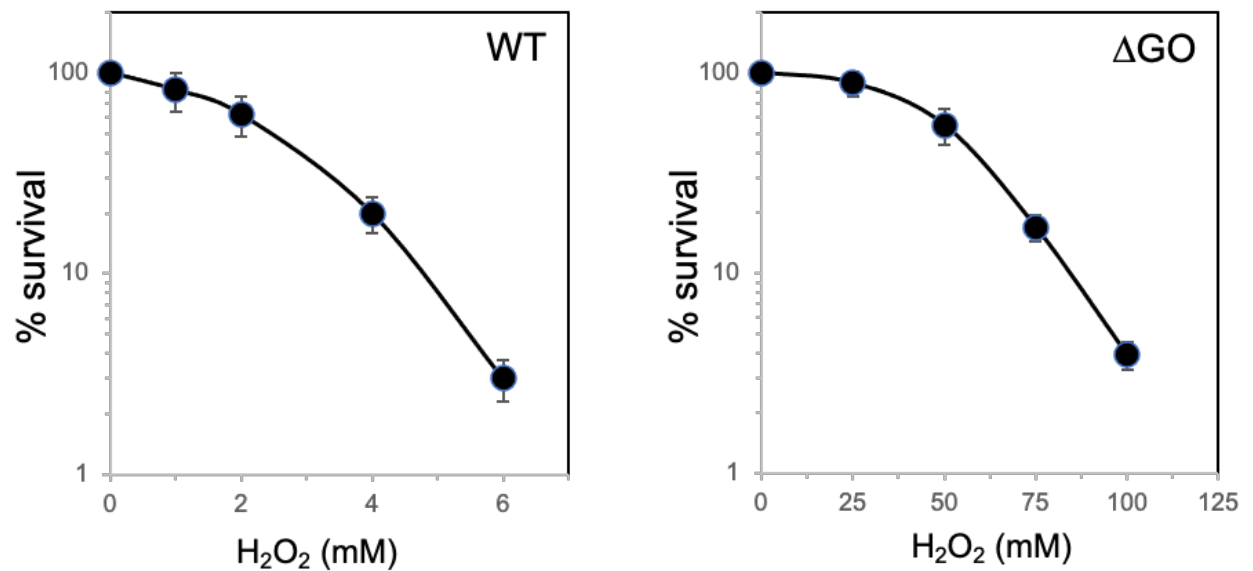

**Supplementary Figure S1.** Hydrogen peroxide susceptibility of *B. subtilis* strains with distinct genotypes (WT and  $\Delta$ GO). The indicated strains propagated to an OD<sub>600</sub> of 1.0 were treated with increasing doses of hydrogen peroxide for 30 min. LD<sub>90s</sub> values were determined from the curves as described in Materials and Methods. Values represent the average of three independent experiments per triplicate  $\pm$  standard deviation.

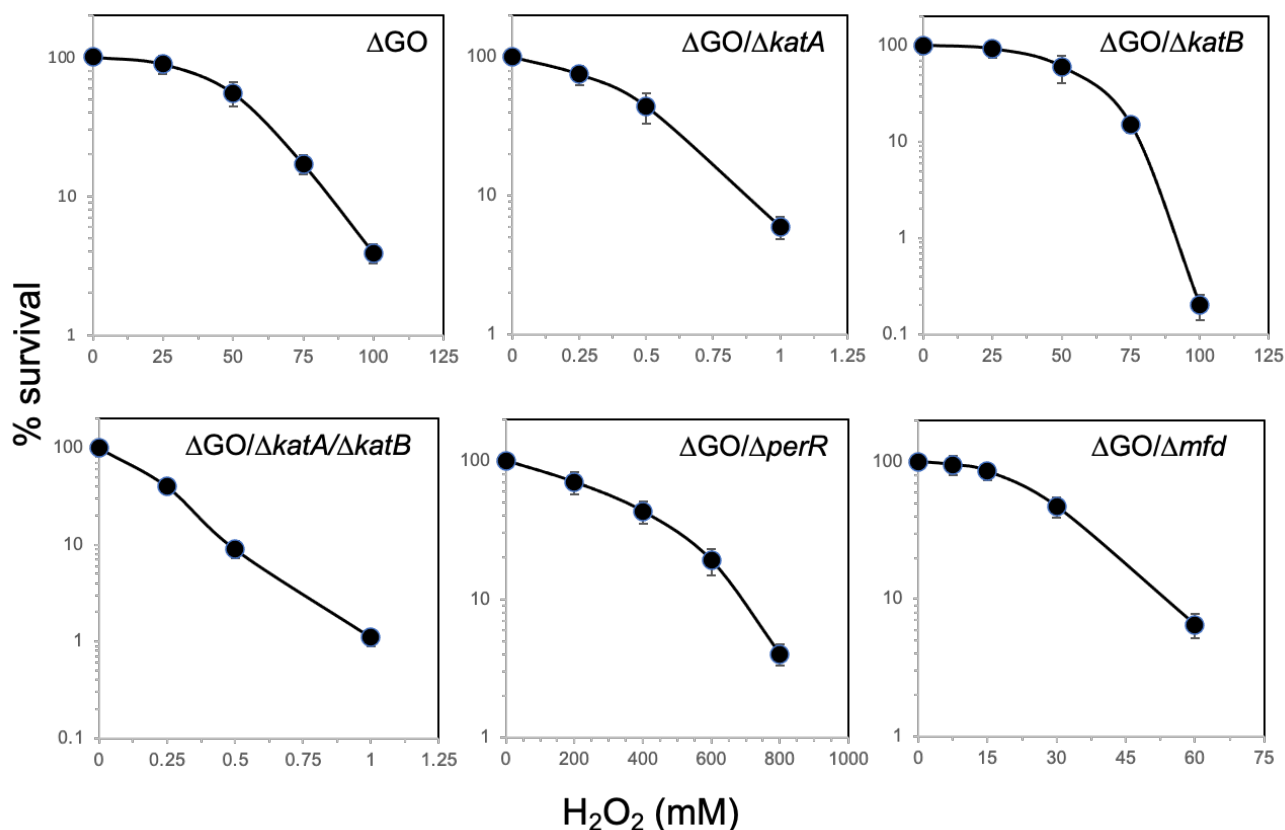

**Supplementary Figure S2.** Hydrogen peroxide susceptibility of *B. subtilis* strains with distinct genotypes ( $\Delta GO$ ,  $\Delta GO/\Delta katA$ ,  $\Delta GO/\Delta katB$ ,  $\Delta GO/\Delta katA/\Delta katB$ ,  $\Delta GO/\Delta perR$  and  $\Delta GO/\Delta mfd$ ). The indicated strains propagated to an  $OD_{600}$  of 1.0 were treated with increasing doses of hydrogen peroxide for 30 min.  $LD_{90s}$  values were determined from the curves as described in Materials and Methods. Values represent the average of three independent experiments per triplicate  $\pm$  standard deviation.

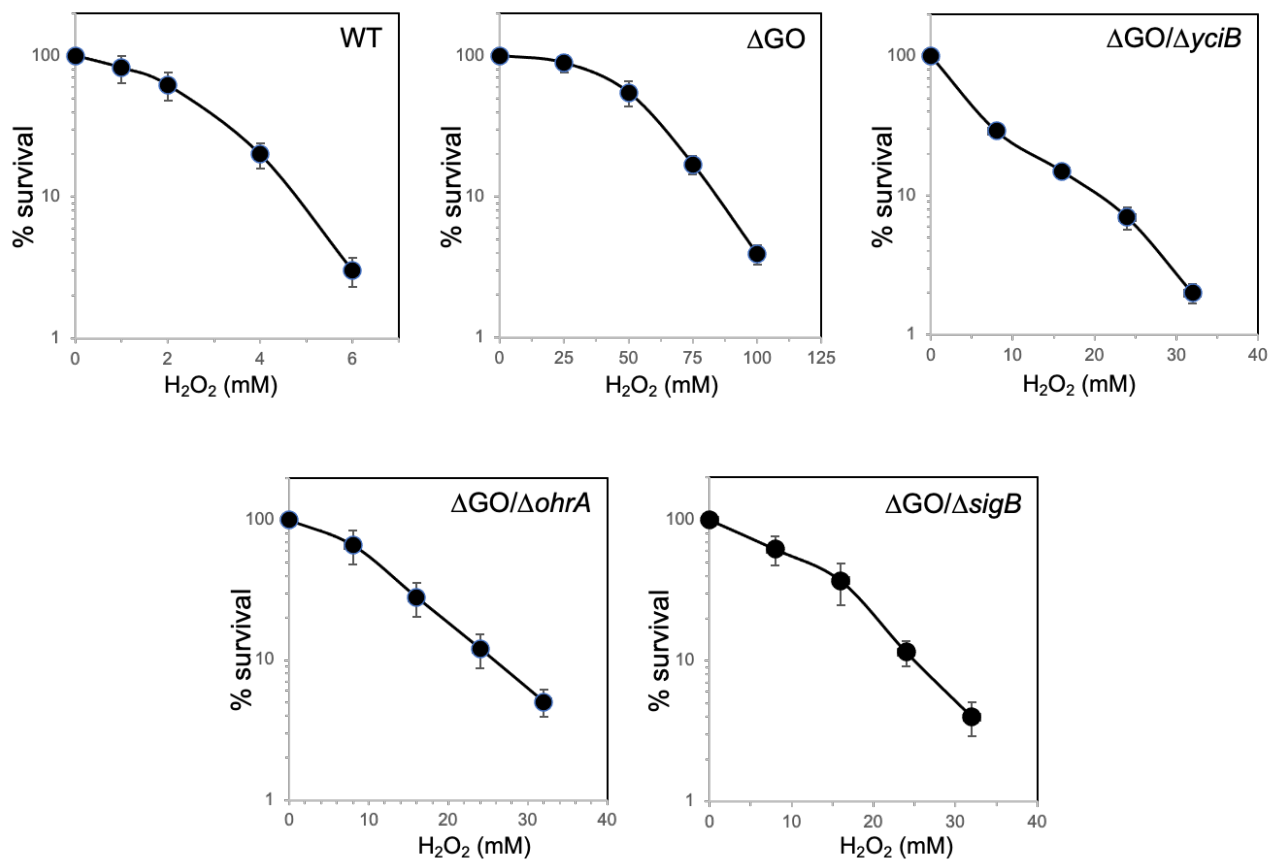

**Supplementary Figure S3.** Hydrogen peroxide susceptibility of *B. subtilis* strains with distinct genotypes (WT,  $\Delta GO$ ,  $\Delta GO/\Delta yciB$ ,  $\Delta GO/\Delta ohrA$  and  $\Delta GO/\Delta sigB$ ). The indicated strains propagated to an  $OD_{600}$  of 1.0 were treated with increasing doses of hydrogen peroxide for 30 min.  $LD_{90s}$  values were determined from the curves as described in Materials and Methods. Values represent the average of three independent experiments per triplicate  $\pm$  standard deviation.

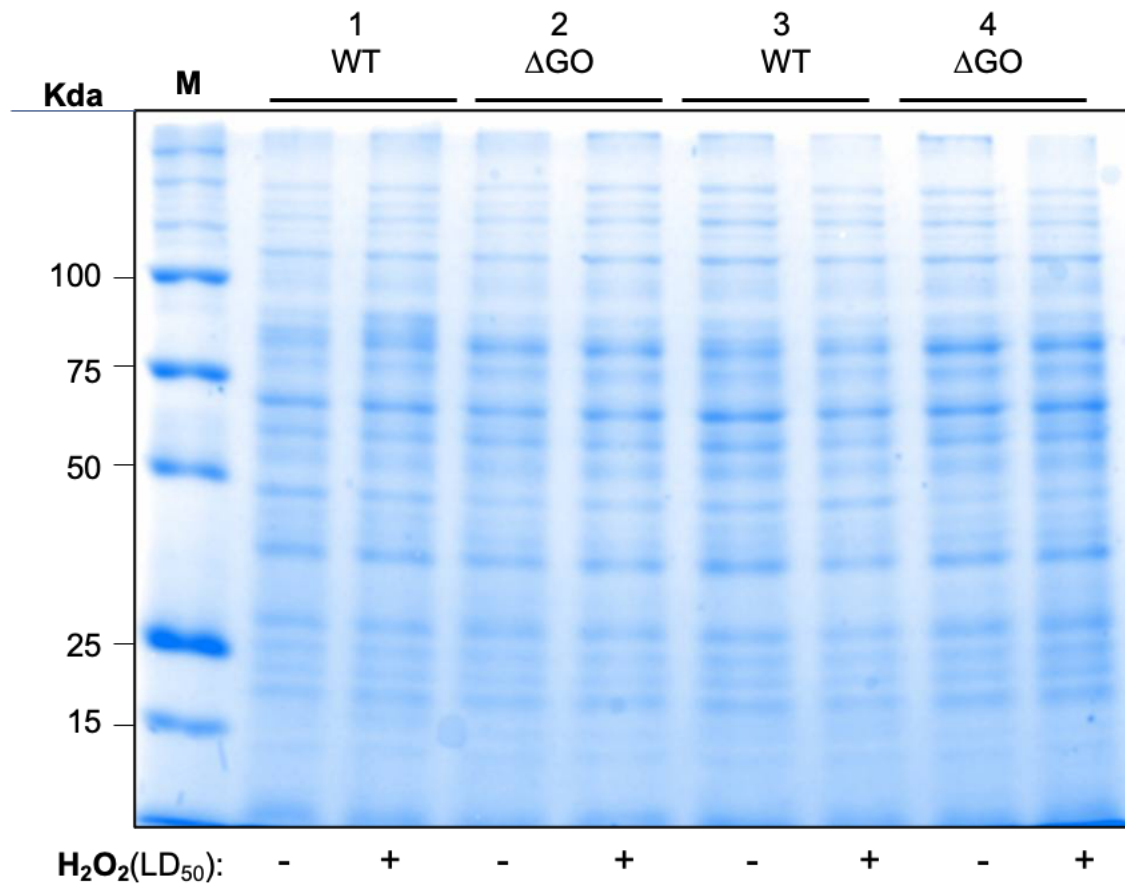

**Supplementary Figure S4.** SDS-PAGE analysis of protein cell extracts from strains *B. subtilis* WT and  $\Delta$ GO. Cell extracts (8 mg) obtained from independent cultures of *B. subtilis* strains WT (1, 3) and  $\Delta$ GO (2, 4), untreated or treated with a LD<sub>90</sub> of H<sub>2</sub>O<sub>2</sub> were separated in a 10% polyacrylamide gel that was stained with Coomassie R- 250 blue dye. **M**: Protein markers.

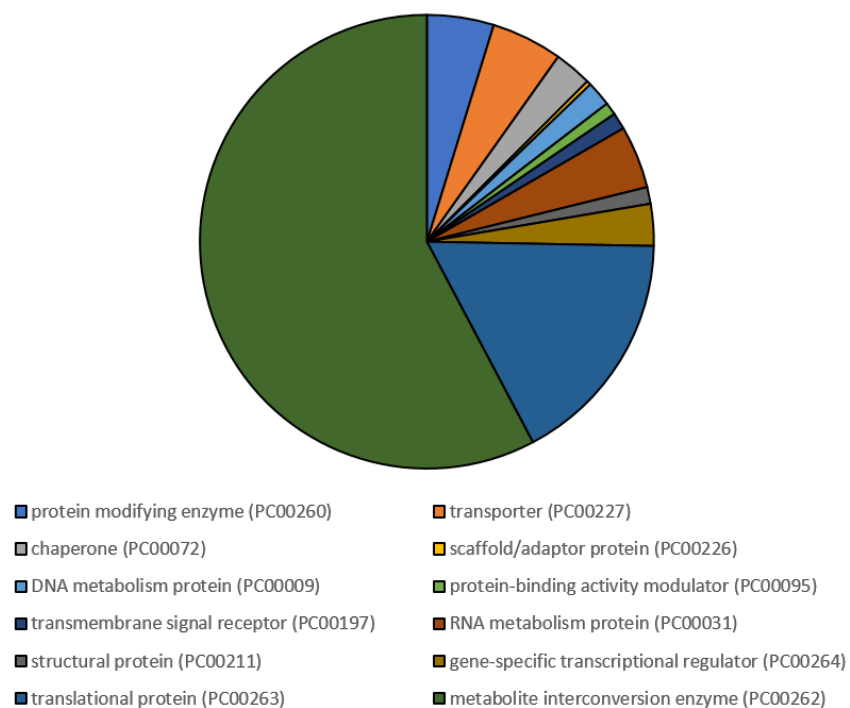

**Supplementary Figure S5.** Functional distribution of differentially expressed class proteins between the WT and  $\Delta$ GO *B. subtilis* strains subjected to hydrogen peroxide stress. PANTHER classification analysis was conducted on the hits found by proteomic analysis.

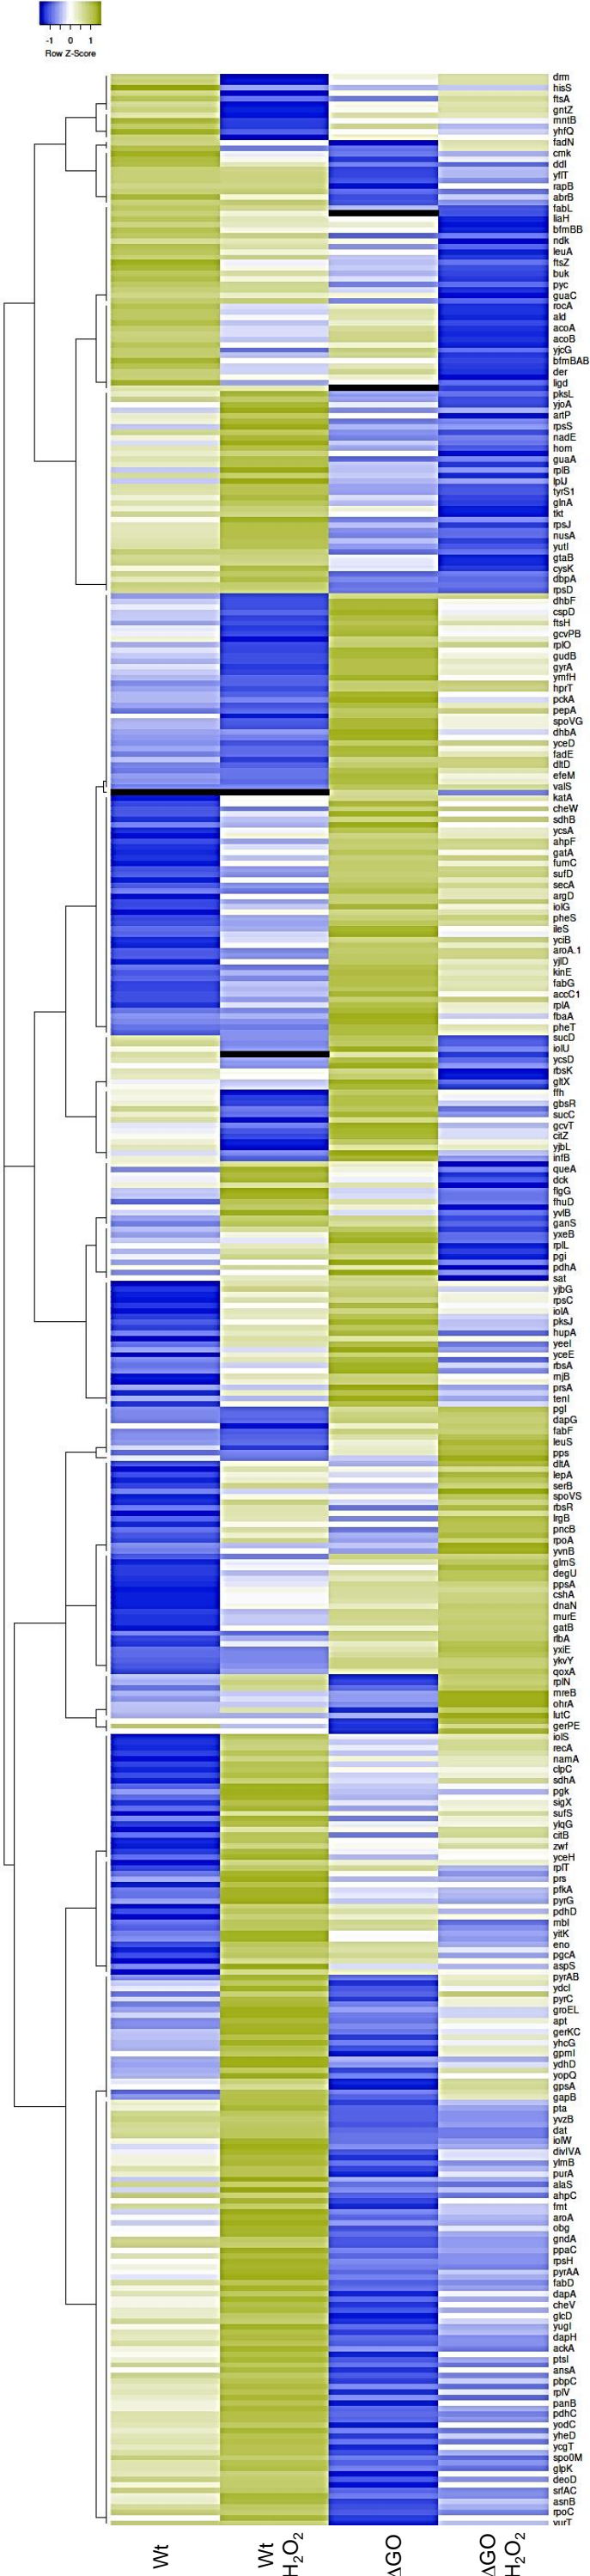

**Supplementary Figure S6.** Complete proteome differences between strains *B. subtilis* WT and  $\Delta$ GO. Heatmap analysis using Log<sub>2</sub> values of the abundance of each protein. Each target was evaluated for complete linkage and Spearman Rank Correlation.
